# Supplementary material
Source: PubMed Central journal article supplement (PMC4446229)
Supplement: NIHMS664116-supplement-supplement_1.pdf [file NIHMS664116-supplement-supplement_1.pdf]

## Online Supplementary Appendix

### ACKNOWLEDGEMENTS

#### Larazotide Acetate Study Group Investigators

*United States:* Atoya Adams (AB Clinical Trials, Las Vegas, NV), Stephen Amann (Digestive Health Specialists, Tupelo, MS), Jeffrey Aron (California Pacific Medical Center, San Francisco, CA), Kamran Ayub (Southwest Gastroenterology, Oak Lawn, IL), Natalie Bachir (Essentia Health, Duluth, MN), Robert Barclay (Rockford Gastroenterology, Rockford, IL), Rudolph Bedford (Santa Monica Research Institute, Santa Monica, CA), Rajat Bhushan (Metabolic Center of Louisiana, Baton Rouge, LA), Vicki Blumberg (Soundview Medical, Norwalk, CT), Wilmot Burch (Franklin Gastroenterology, Franklin, TN), Khai Chang (Lakeview Medical Research, Summerfield, FL), Shane Christensen (J. Lewis Research Inc., Salt Lake City, UT), Allan Coates (Gastroenterology Associates of Western Michigan, Wyoming, MI), Lawrence Cohen (Medical Research Associates of New York, New York, NY), Anthony Colatrella (RPMS, Pittsburgh, PA), John Condemi (AAIR Research Center, Rochester, NY), Clancy Cone (Montana Medical Research, Missoula, MT), Craig Curtis (Compass Research, Orlando, FL), Mark DeMeo (Rush University Medical Center, Chicago, IL), Douglas Denham (Clinical Trials of Texas, Inc, San Antonio, TX), Christopher Devereaux (Alliance Clinical Research, Oceanside, CA), Anthony DiMarino (Thomas Jefferson University, Philadelphia, PA), Gerald Dryden (University of Louisville, Louisville, KY), Madeline DuPree (Consultants for Clinical Research of S. Florida, Boynton Beach, FL), Craig Ennis (Community Clinical Trials, Orange, CA), David Eskreis (New York Center for Clinical Research, Lake Success, NY), Beal Essink (Oregon Center for Clinical Investigations, Inc, Portland, OR), Nelson Ferreira (Meritus Center for Clinical Research, Hagerstown, MD), Deborah Flomenhoft (University of Kentucky, Lexington, KY), Ronald Fogel (Clinical Research Institute of Michigan, Chesterfield, MI), Keith Friedenber (Great Lakes Gastroenterology, Mentor, OH), Peter Green and Christina Tennyson (Columbia University, New York, NY), Michael Grossman (Clinical Research Associates, Oklahoma City, OK), Kumar Gutta (Texas Health Research & Education, Fort Worth, TX), Ahmed Hasan (Northeast Clinical Research Center, Bethlehem, PA), Dan Henry (J. Lewis Research, Inc, Salt Lake City, UT), Reed Hogan (Gastrointestinal Associates, Jackson, MS), Susan Hole (Riverside Clinical Research, Edgewater, FL), Robert Holmes (PMG Research of Winston-Salem, Winston-Salem, NC), Kiran Jagarlmudi (PMG Research of Salisbury, Salisbury, NC), Rajeev Jain (Texas Health Research & Education, Dallas, TX), Rajesh Jain (Rocky Mountain Clinical Research, Denver, CO), Ciaran Kelly and Daniel Leffler (Beth Israel Medical Center, Boston, MA), Thomas Klein (Heartland Research Associates, Wichita, KS), Richard Krause (ClinSearch, LLC, Chattanooga, TN), Keith Laskin (Pivotal Clinical Research LLC, Perkasio, PA), Michael LeVine (Atlanta Gastroenterology Associates, Marietta, GA), Nasrulla Manji (Pioneer Research Solutions Inc, Sugar Land, TX), Stephen Minton (Alexandria Clinical Research, Alexandria, VA), Vijay Narayan (Digestive Disease Associates, Baltimore, MD), Eric Newton (Omega Medical Research, Warwick, RI), James Novick (Charm City Research, Towson, MD), Robert Onder (Midwest Clinical Research, St. Louis, MO), Daniel Pambianco (Charlottesville

Medical Research, Charlottesville, VA), Craig Pepin (The Polyclinic-Madison Center, Seattle, WA), Joseph Murray (Mayo Clinic, Rochester, MN), Ramon Reyes (The Iowa Clinic, West Des Moines, IA), Joseph Savon (South Jersey Gastroenterology, Marlton, NJ), Leah Schmidt (Genova Clinical Research, Tucson, AZ), Purvee Shah (West Coast Clinical Trials LLC, Costa Mesa, CA), Alex Sherman (Concorde Medical Group PLLC, New York, NY), Helen Stacey (Diablo Clinical Research, Walnut Creek, CA), David Tessler (Central Arizona Medical Associates, Mesa, AZA), Raymond Tobias (Birmingham Gastroenterology Association, Birmingham, AL), Douglas Trate (MediSpect LLC, Boone, NC), Chung Tsai (Digestive Disease, Cleveland, OH), Martin van Cleeff (PMG Research of Cary, Cary, NC), Joseph Woolley (Chrysalis Clinical Research, St. George, UT). *Canada:* Premysl Bercik (McMasters University, Hamilton, ON), Brian Bressler (GI Research Institute, Vancouver, BC), Richard Fedorak (University of Alberta, Edmonton, Alberta, Canada), Sally Godsell (Okanagan Clinical Trials Ltd, Kelowna, BC), Henryk Pluta (Gastroenterology and Hepatology Clinic, Abbotsford, BC), and Ranjit Singh (PerCuro Clinical Research Ltd, Victoria, BC).

**Supplementary Appendix Table S-1. Adverse Events Leading to Withdrawal From the Study**

| <b>Dosing Group</b>                                                                  | <b>Patient no.</b> | <b>TEAE?</b> | <b>Preferred Term</b>                                                   | <b>Drug Related?</b>                         |
|--------------------------------------------------------------------------------------|--------------------|--------------|-------------------------------------------------------------------------|----------------------------------------------|
| <b>Placebo</b>                                                                       | 1                  | Yes          | Diarrhea<br>Nausea<br>Abdominal pain - upper                            | Probably<br>Probably<br>Probably             |
|                                                                                      | 2                  | Yes          | Colitis – microscopic                                                   | No                                           |
|                                                                                      | 3                  | Yes          | Headache                                                                | Probably                                     |
| <b>0.5 mg TID</b>                                                                    | 1                  | Yes          | Basedow's Disease                                                       | Unlikely                                     |
|                                                                                      | 2                  | Yes          | Migraine                                                                | Possibly                                     |
|                                                                                      | 3                  | No           | Myalgia<br>Musculoskeletal stiffness<br>Asthenia<br>Arthritis           | No<br>No<br>No<br>No                         |
|                                                                                      | 4                  | Yes          | Eructation<br>Flatulence<br>Abdominal pain – upper                      | Probably<br>Probably<br>Probably             |
|                                                                                      | 5                  | Yes          | Gastroesophageal reflux disease                                         | No                                           |
| <b>1.0 mg TID</b>                                                                    | 1                  | Yes          | Diarrhea                                                                | No                                           |
|                                                                                      | 2                  | Yes          | Vertigo                                                                 | Probably                                     |
|                                                                                      | 3                  | Yes          | Abdominal distension<br>Fatigue<br>Fecal incontinence                   | Unlikely<br>Unlikely<br>Unlikely             |
|                                                                                      | 4                  | Yes          | Celiac disease<br>Gastroenteritis viral                                 | Unlikely<br>No                               |
|                                                                                      | 5                  | Yes          | Diarrhea                                                                | Possibly                                     |
| <b>2.0 mg TID</b>                                                                    | 1                  | Yes          | Anxiety                                                                 | No                                           |
|                                                                                      | 2                  | Yes          | Headache                                                                | Yes                                          |
|                                                                                      | 3                  | No           | Arthralgia<br>Myalgia<br>Headache<br>Asthenia<br>Nausea                 | No<br>No<br>No<br>No<br>No                   |
|                                                                                      | 4                  | No           | Headache                                                                | No                                           |
|                                                                                      | 5                  | Yes          | Memory impairment<br>Disturbance in attention<br>Constipation<br>Nausea | Unlikely<br>Unlikely<br>Possibly<br>Possibly |
| TID=three times daily; TEAE=treatment-emergent adverse event<br>MedDRA coding system |                    |              |                                                                         |                                              |

**Supplementary Appendix Table S-2. Treatment-Emergent Adverse Events Occurring in ≥3% of Patients in any Treatment Group**

|                                             | <b>Larazotide Acetate (n=258)</b>    |                                         |                                         |                                         |
|---------------------------------------------|--------------------------------------|-----------------------------------------|-----------------------------------------|-----------------------------------------|
|                                             | <b>Placebo<br/>(n=84),<br/>n (%)</b> | <b>0.5 mg TID<br/>(n=85),<br/>n (%)</b> | <b>1.0 mg TID<br/>(n=84),<br/>n (%)</b> | <b>2.0 mg TID<br/>(n=87),<br/>n (%)</b> |
| <b>Subjects with at least one AE</b>        | 53 (63.1)                            | 54 (63.5)                               | 52 (61.9)                               | 54 (62.1)                               |
| <b>System organ class</b><br>Preferred term |                                      |                                         |                                         |                                         |
| <b>Gastrointestinal disorders</b>           | 21 (25.0)                            | 20 (23.5)                               | 28 (33.3)                               | 27 (31.0)                               |
| Diarrhea                                    | 7 (8.3)                              | 7 (8.2)                                 | 5 (6.0)                                 | 8 (9.2)                                 |
| Nausea                                      | 9 (10.7)                             | 4 (4.7)                                 | 7 (8.3)                                 | 7 (8.0)                                 |
| Constipation                                | 2 (2.4)                              | 3 (3.5)                                 | 7 (8.3)                                 | 5 (5.7)                                 |
| Abdominal pain                              | 4 (4.8)                              | 1 (1.2)                                 | 5 (6.0)                                 | 6 (6.9)                                 |
| Vomiting                                    | 6 (7.1)                              | 2 (2.4)                                 | 2 (2.4)                                 | 3 (3.4)                                 |
| Abdominal pain – upper                      | 2 (2.4)                              | 3 (3.5)                                 | 4 (4.8)                                 | 2 (2.3)                                 |
| Abdominal distention                        | 1 (1.2)                              | 2 (2.4)                                 | 5 (6.0)                                 | 1 (1.1)                                 |
| Flatulence                                  | 0                                    | 2 (2.4)                                 | 4 (4.8)                                 | 3 (3.4)                                 |
| Gastroesophageal reflux disease (GERD)      | 0                                    | 2 (2.4)                                 | 1 (1.2)                                 | 6 (6.9)                                 |
| Dyspepsia                                   | 3 (3.6)                              | 1 (1.2)                                 | 2 (2.4)                                 | 2 (2.3)                                 |
| <b>Infections and Infestations</b>          | 25 (29.8)                            | 23 (27.1)                               | 23 (27.4)                               | 18 (20.7)                               |
| Sinusitis                                   | 5 (6.0)                              | 5 (5.9)                                 | 5 (6.0)                                 | 4 (4.6)                                 |
| Nasopharyngitis                             | 4 (4.8)                              | 4 (4.7)                                 | 5 (6.0)                                 | 3 (3.4)                                 |
| Influenza                                   | 4 (4.8)                              | 3 (3.5)                                 | 4 (4.8)                                 | 2 (2.3)                                 |
| Urinary tract infection                     | 2 (2.4)                              | 1 (1.2)                                 | 1 (1.2)                                 | 5 (5.7)                                 |
| Gastroenteritis, viral                      | 2 (2.4)                              | 1 (1.2)                                 | 3 (3.6)                                 | 2 (2.3)                                 |
| Upper respiratory tract infection           | 0                                    | 2 (2.4)                                 | 1 (1.2)                                 | 3 (3.4)                                 |
| Pharyngitis streptococcal                   | 0                                    | 3 (3.5)                                 | 1 (1.2)                                 | 0                                       |
| <b>Nervous System Disorders</b>             | 10 (11.9)                            | 8 (9.4)                                 | 6 (7.1)                                 | 12 (13.8)                               |
| Headache                                    | 8 (9.5)                              | 2 (2.4)                                 | 5 (6.0)                                 | 6 (6.9)                                 |

|                                                                                                                                                                                                                                                                                     |         |         |         |         |
|-------------------------------------------------------------------------------------------------------------------------------------------------------------------------------------------------------------------------------------------------------------------------------------|---------|---------|---------|---------|
| <b>General disorders and administration site conditions</b>                                                                                                                                                                                                                         | 2 (2.4) | 4 (4.7) | 5 (6.0) | 8 (9.2) |
| Fatigue                                                                                                                                                                                                                                                                             | 0       | 1 (1.2) | 3 (3.6) | 6 (6.9) |
| <b>Musculoskeletal and connective tissue disorders</b>                                                                                                                                                                                                                              | 5 (6.0) | 6 (7.1) | 3 (3.6) | 5 (5.7) |
| Fatigue                                                                                                                                                                                                                                                                             | 0       | 1 (1.2) | 3 (3.6) | 6 (6.9) |
| Back pain                                                                                                                                                                                                                                                                           | 3 (3.6) | 1 (1.2) | 1 (1.2) | 2 (2.3) |
| <b>Skin and subcutaneous tissue disorders</b>                                                                                                                                                                                                                                       | 5 (6.0) | 5 (5.9) | 3 (3.6) | 3 (3.4) |
| <b>Respiratory, thoracic and mediastinal disorders</b>                                                                                                                                                                                                                              | 4 (4.8) | 4 (4.7) | 2 (2.4) | 5 (5.7) |
| Cough                                                                                                                                                                                                                                                                               | 3 (3.6) | 0       | 0       | 0       |
| <b>Investigations</b>                                                                                                                                                                                                                                                               | 3 (3.6) | 6 (7.1) | 1 (1.2) | 4 (4.6) |
| Low serum ferritin                                                                                                                                                                                                                                                                  | 1 (1.2) | 3 (3.5) | 0       | 0       |
| <b>Psychiatric Disorders</b>                                                                                                                                                                                                                                                        | 1 (1.2) | 3 (3.5) | 1 (1.2) | 2 (2.3) |
| Patients are counted only once per category. A treatment-emergent adverse event (TEAE) was defined as an AE that occurred during double-blind treatment phase any time between the first dose and 7 days after the last dose of study drug. TEAEs coded using MedDRA version v.14.1 |         |         |         |         |

**Supplementary Appendix Table S-3. Adverse Events Relating to Iron Status in the Placebo and 0.5mg groups**

| Subject | Treatment                | Baseline ferritin | week 12/end of treatment ferritin |
|---------|--------------------------|-------------------|-----------------------------------|
| 1       | 0.5mg Larazotide acetate | 8.5               | 25.3                              |
| 2       | 0.5mg Larazotide acetate | 7.0               | 6.8                               |
| 3       | 0.5mg Larazotide acetate | 10.7              | 7.3*                              |
| 4       | 0.5mg Larazotide acetate | 5.9               | 9.8                               |
| 5       | Placebo                  | 10.2              | 40.6                              |
| 6       | Placebo                  | 11.7              | 8.0                               |

\*early termination

## Supplementary Appendix Figure S-1. Tight Junction Structure and Mechanism of Action of Larazotide Acetate

Larazotide acetate is a Tight Junction (TJ) regulator octapeptide inhibitor of *Vibrio Cholera* zonula occludens toxin. TJs comprise over 50 proteins, including the transmembrane proteins occluding claudin, junctional adhesion molecule (JAM), and cytoplasmic scaffolding proteins zonula occludens (ZO)-1, ZO-2, and ZO-3. Larazotide acetate inhibits the cytoskeletal rearrangement and ZO-1 redistribution caused by gliadin in epithelial cells, regulates actin rearrangement, and stabilises TJ *in vitro* in response to various stimuli, including inflammatory cytokines, bacterial products, and gliadin. Additionally, larazotide acetate inhibits transepithelial gliadin transport *in vitro* and decreases intestinal permeability and preserves barrier function *in vitro* and *in vivo*. From Martinez et al. Cellular and Molecular Basis of Intestinal Barrier Dysfunction in the Irritable Bowel Syndrome. *Gut and Liver* 2012;6(3):305-315. © Korean Association of Medical Journal Editors. <http://gutnliver.org>

**Supplementary Appendix Figure S-2. No Increase or Worsening of Serum Antibody Levels**



## **Supplementary Appendix A. The Gastrointestinal Symptom Rating Scale (CeD-GSRS)**

(\*Asterisks represent the 10 items on the Celiac Disease domains of the GSRS [CeD-GSRS])

This survey contains questions about how you have been feeling and what it has been like during the past week. Mark the choice that best applies to you and your situation with an "X" in the box

1.\* Have you been bothered by PAIN OR DISCOMFORT IN YOUR UPPER ABDOMEN OR THE PIT OF YOUR STOMACH during the past week?

- No discomfort at all
- Minor discomfort
- Mild discomfort
- Moderate discomfort
- Moderately severe discomfort
- Severe discomfort
- Very severe discomfort

2. Have you been bothered by HEARTBURN during the past week? (By heartburn we mean an unpleasant stinging or burning sensation in the chest.)

- No discomfort at all
- Minor discomfort
- Mild discomfort
- Moderate discomfort
- Moderately severe discomfort
- Severe discomfort
- Very severe discomfort

3. Have you been bothered by ACID REFLUX during the past week? (By acid reflux we mean the sensation of regurgitating small quantities of acid or flow of sour or bitter fluid from the stomach up to the throat.)

- No discomfort at all
- Minor discomfort
- Mild discomfort
- Moderate discomfort
- Moderately severe discomfort
- Severe discomfort
- Very severe discomfort

4.\* Have you been bothered by HUNGER PAINS in the stomach during the past week? (This hollow feeling in the stomach is associated with the need to eat between meals.)

- No discomfort at all
- Minor discomfort
- Mild discomfort
- Moderate discomfort
- Moderately severe discomfort
- Severe discomfort
- Very severe discomfort

5.\* Have you been bothered by NAUSEA during the past week? (By nausea we mean a feeling of wanting to throw up or vomit.)

- No discomfort at all
- Minor discomfort
- Mild discomfort
- Moderate discomfort

- Moderately severe discomfort
- Severe discomfort
- Very severe discomfort

6.\* Have you been bothered by RUMBLING in your stomach during the past week?  
(Rumbling refers to vibrations or noise in the stomach.)

- No discomfort at all
- Minor discomfort
- Mild discomfort
- Moderate discomfort
- Moderately severe discomfort
- Severe discomfort
- Very severe discomfort

7.\* Has your stomach felt BLOATED during the past week? (Feeling bloated refers to swelling often associated with a sensation of gas or air in the stomach.)

- No discomfort at all
- Minor discomfort
- Mild discomfort
- Moderate discomfort
- Moderately severe discomfort
- Severe discomfort
- Very severe discomfort

8.\* Have you been bothered by BURPING during the past week? (Burping refers to bringing up air or gas from the stomach via the mouth, often associated with easing a bloated feeling.)

- No discomfort at all
- Minor discomfort
- Mild discomfort
- Moderate discomfort
- Moderately severe discomfort
- Severe discomfort
- Very severe discomfort

9.\* Have you been bothered by PASSING GAS OR FLATUS during the past week?  
(Passing gas or flatus refers to the need to release air or gas from the bowel,  
often associated with easing a bloated feeling.)

- No discomfort at all
- Minor discomfort
- Mild discomfort
- Moderate discomfort
- Moderately severe discomfort
- Severe discomfort
- Very severe discomfort

10. Have you been bothered by CONSTIPATION during the past week?  
(Constipation refers to a reduced ability to empty the bowels.)

- No discomfort at all
- Minor discomfort
- Mild discomfort
- Moderate discomfort
- Moderately severe discomfort
- Severe discomfort
- Very severe discomfort

11.\* Have you been bothered by DIARRHEA during the past week? (Diarrhea refers to a too-frequent emptying of the bowels.)

- No discomfort at all
- Minor discomfort
- Mild discomfort
- Moderate discomfort
- Moderately severe discomfort
- Severe discomfort
- Very severe discomfort

12.\* Have you been bothered by LOOSE STOOLS during the past week? (If your stools (motions) have been alternately hard and loose, this question only refers to the extent you have been bothered by the stools being loose.)

- No discomfort at all
- Minor discomfort
- Mild discomfort
- Moderate discomfort
- Moderately severe discomfort
- Severe discomfort
- Very severe discomfort

13. Have you been bothered by HARD STOOLS during the past week? (If your stools (motions) have been alternately hard and loose, this question only refers to the extent you have been bothered by the stools being hard.)

- No discomfort at all
- Minor discomfort
- Mild discomfort

- Moderate discomfort
- Moderately severe discomfort
- Severe discomfort
- Very severe discomfort

14.\* Have you been bothered by an URGENT NEED TO HAVE A BOWEL MOVEMENT during the past week? (This urgent need to go to the toilet is often associated with a feeling that you are not in full control.)

- No discomfort at all
- Minor discomfort
- Mild discomfort
- Moderate discomfort
- Moderately severe discomfort
- Severe discomfort
- Very severe discomfort

15. When going to the toilet during the past week, have you had the SENSATION OF NOT COMPLETELY EMPTYING THE BOWELS? (This feeling of incomplete emptying means that you still feel a need to pass more stool despite having exerted yourself to do so.)

- No discomfort at all
- Minor discomfort
- Mild discomfort
- Moderate discomfort
- Moderately severe discomfort
- Severe discomfort
- Very severe discomfort

## Appendix B. Celiac Disease Patient Reported Outcome (CeD PRO)®

*Instructions: These questions ask about how you feel each day. Please complete the daily diary every evening, at approximately the same time.*

**1. Thinking about your worst experience in the past 24 hours, how severe was each of the following symptoms? On the following screens, please tap a number to indicate how you felt.**

a. How severe was your abdominal cramping?

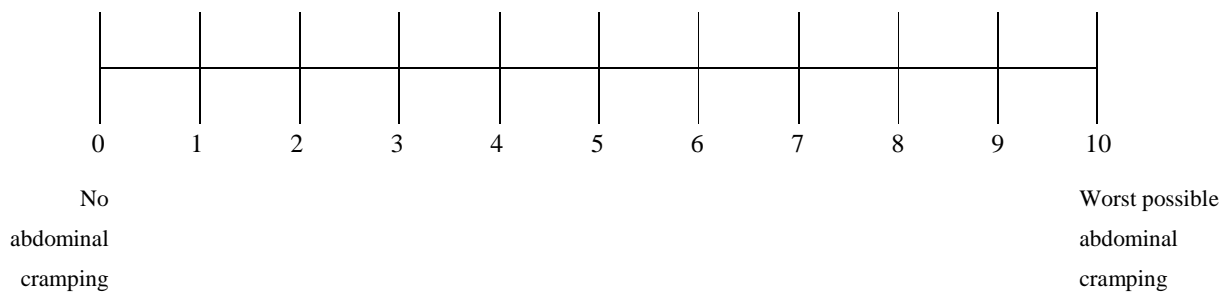

b. How severe was your abdominal pain?

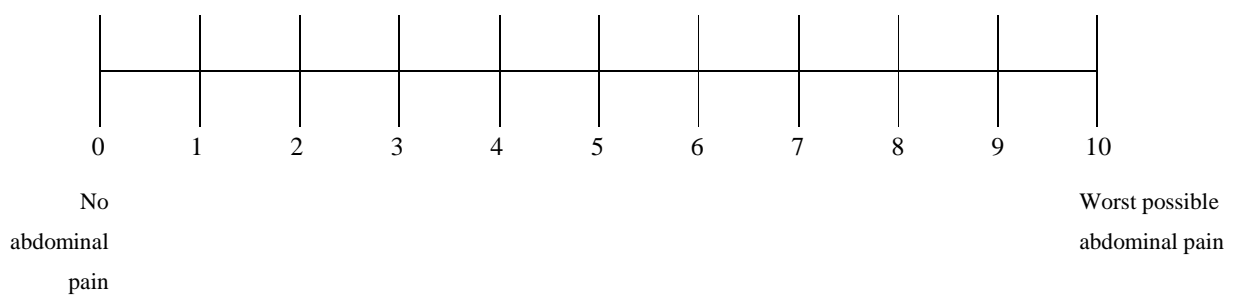

c. How severe was your bloating?

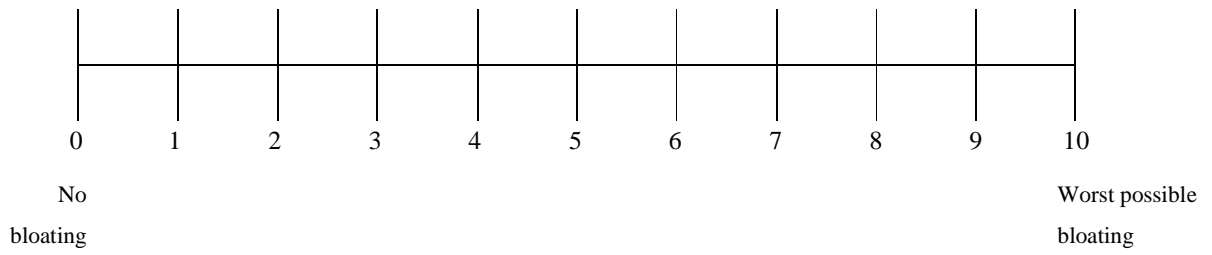

d. How severe was your constipation?

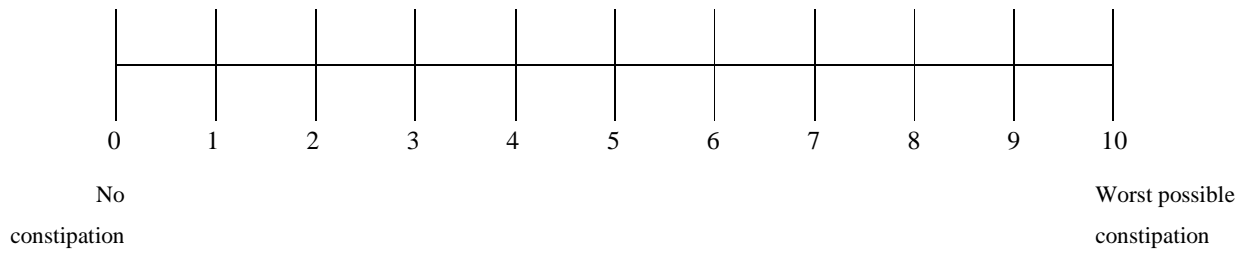

e. How severe was your diarrhea?

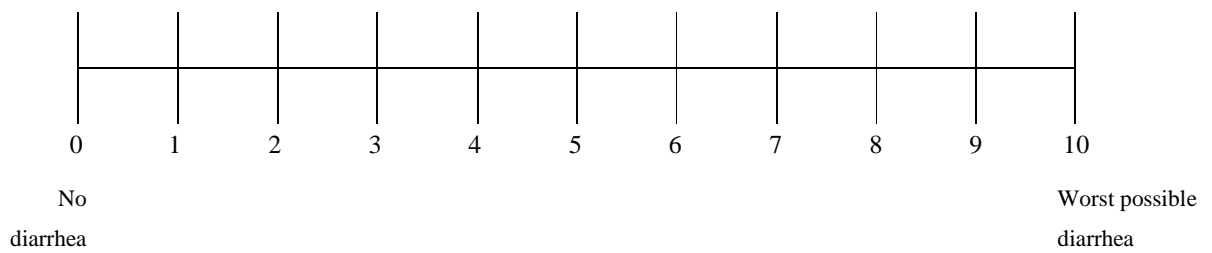

f. How severe was your gas (flatulence)?

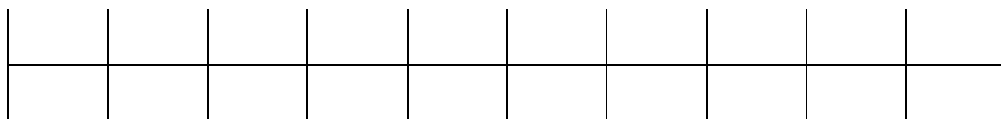





j. How severe was your headache(s)?

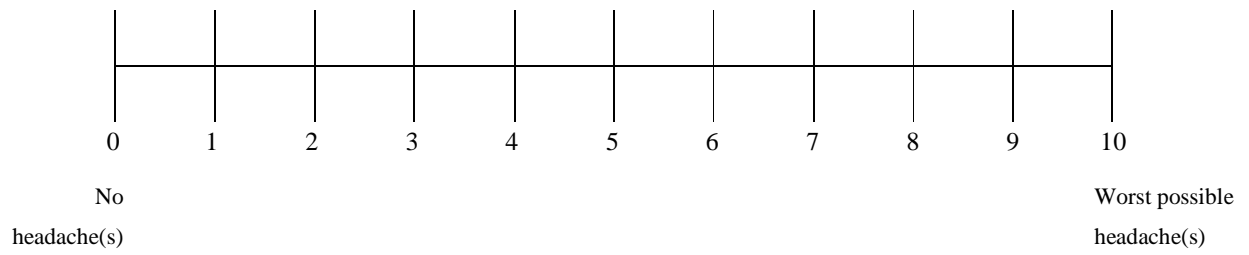

k. How severe was your tiredness?

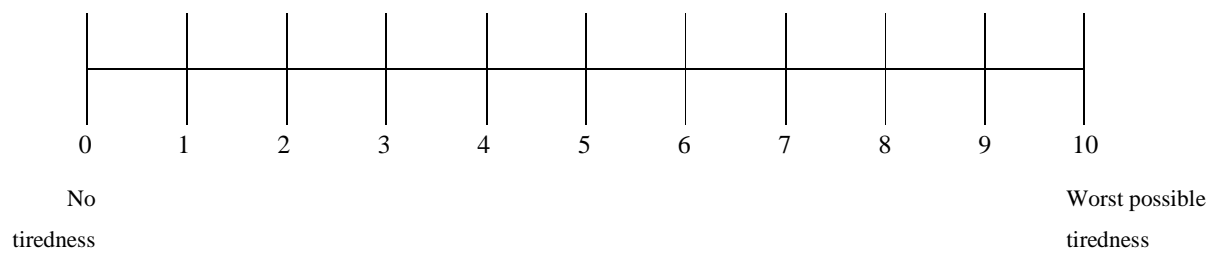

**APPENDIX C. GLUTEN-FREE DIET COMPLIANCE QUESTIONNAIRE (GFDCQ)**

Participant ID: \_\_\_\_\_ Date of Interview: \_\_\_\_\_

Name of Interviewer: \_\_\_\_\_

NOTE: This interview should be conducted by the study staff. Study subjects **SHOULD NOT** complete the interview directly on the interview form.

**1. Are you currently following a gluten free diet?**

1 Yes

0 No If no, please explain: \_\_\_\_\_

**2. How confident are you that you fully understand the gluten free diet?**

0 Not at all confident

1 Somewhat confident

2 Very confident

**3. During the time that you were taking your study medication, did you ever knowingly consume a food item or beverage that contained gluten?**

0 No

1 Yes If yes, what food? \_\_\_\_\_

Quantity of food consumed? \_\_\_\_\_

When food was consumed? \_\_\_\_\_

**4. During the time that you were taking your study medication, did you eat a food or beverage that you thought was gluten free but found out later it contained gluten or was contaminated with gluten?**

0 No

1 Yes If yes, what food? \_\_\_\_\_

Quantity of food consumed? \_\_\_\_\_

When food was consumed? \_\_\_\_\_

**5. During the time that you were taking your study medication, were you reading ingredient labels to detect gluten in foods?**

1 Yes

0 No If no, was it because you

2 Called manufacturers

3 Used only naturally gluten-free, unprocessed foods

4 Used only foods labeled gluten free

5 Bought only foods on lists of GF foods (shopper's guide from stores, support groups, websites)

6 Did not shop for food since the time you started taking your study medication

7 Other: \_\_\_\_\_

**6. Since you started taking your study medication, have you been reading labels or otherwise verifying the gluten free status on any of the following items:**

6a. Prescription medications

0 No If no, was this because:

88 You did not need a prescription since the you started taking your study medication

77 Other: \_\_\_\_\_

1 Yes If yes, how did you verify the gluten free status?

- 5 Called the manufacturer yourself
- 4 Asked the pharmacist to call the manufacturer
- 3 Used a website to verify
- 2 Checked with prescribing medical provider
- 77 Other \_\_\_\_\_

6b. Over the counter (OTC) medications

0 No      If no, was this because:

88 You did not need OTC medications since you started taking your study medication

77 Other: \_\_\_\_\_

1 Yes      If yes, how did you verify the gluten free status?

- 5 Called the manufacturer yourself
- 4 Asked the pharmacist to call the manufacturer
- 3 Used a website to verify
- 2 Checked with a medical provider
- 77 Other \_\_\_\_\_

**7. During the time that you were taking your study medication, have you been reading labels...**

- 3 Every time item was purchased
- 2 First time item was purchased
- 1 Intermittently when purchasing items
- 0 Never

88 Have not shopped since you started taking your study medication

77 Other: \_\_\_\_\_

**8. During the time that you were taking your study medication, how did you manage cross contamination at home (check all that apply)**

3 Entire household is gluten free, so I didn't worry about cross contamination (SKIP TO QUESTION 9))

8a. Cooking

2 Dedicated items for gluten free cooking (toaster/toaster oven)

1 Shared prep items (e.g., toaster/toaster oven) but cleaned between gluten free and non-gluten free foods

0 I did not manage cross contamination

8b. Food items

3 Dedicated items for gluten free foods (condiments, butter, peanut butter)

2 Shared food items, but items are in squeeze bottles (condiments, butter, peanut butter)

1 "Single dip rule" followed (clean utensil is inserted into bottle but not reinserted after touching gluten containing food item)

0 I did not manage cross contamination for food items

**9. Since you started taking your study medication, have you taken Holy Communion?**

0 No

1 Yes If yes, do you?

2 Take the regular communion host

3 Provide church with a gluten free communion host

4 Provide church with a low gluten communion host

Do you?

5 Drink wine from communal cup

6 Drink wine from separate cup

7 Avoid wine if bread is dipped in wine

**10. During the time that you were taking your study medication, did you eat away from home (someone else handles the food prep i.e.: at a restaurant, friend's or relative's house)?**

0 No (SKIP TO QUESTION 12)

Yes If yes, how many times? \_\_\_\_\_

**11. When you ate away from home did you**

**(CHECK ALL THAT APPLY)**

11a. At Restaurants

1 Identify yourself as someone with special dietary needs

2 Depend on the menu description for gluten free foods

3 Eat only in restaurants with a gluten free menu

4 Ask to speak to the Chef or manager regarding ingredients used

5 Ask that your foods be prepared on clean, uncontaminated surfaces

6 Request special prep of foods order (i.e.: no croutons, no sauces, and no bun)

7 Ask if naturally gluten-free foods (like French fries) are made in dedicated fryer/on dedicated/clean surfaces

11b. At a friend/relative's house

1 Identify yourself as someone with special dietary needs (i.e., remind friends/relatives of your diet)

2 Look at food/ask for descriptions to determine the likelihood that they are gluten free

3 Ask to speak to the person who prepared the meal regarding ingredients used

4 Ask that your foods be prepared on clean, uncontaminated surfaces

5 Bring own food

6 Do not eat

11c. At other social events

1 Identify yourself as someone with special dietary needs

2 Look at food/ask for descriptions to determine the likelihood that they are gluten free

3 Ask to speak to the host/hostess, manager or person who prepared the food regarding the ingredients used

4 Bring own food

5 Do not eat

**12. During the time that you were taking study medication, did you contact a celiac support group, either local or national, for information on Gluten Free Foods?**

0 No

1 Yes      If yes, name of support group \_\_\_\_\_

**13. Since you started taking your study medication, did you take any trips requiring you to stay away from home overnight?**

0 No

1 Yes

13a. If yes, were you able to follow the gluten free diet while traveling?

1 Yes



0 No

If no was it because:

2 Could not find gluten free foods at restaurants/airport/etc

3 Could not afford gluten free alternatives

4 Gluten free foods not available during travel

5 Too much hassle/embarrassment to get gluten free foods

6 Other

*External (Gliadin Peptides)*

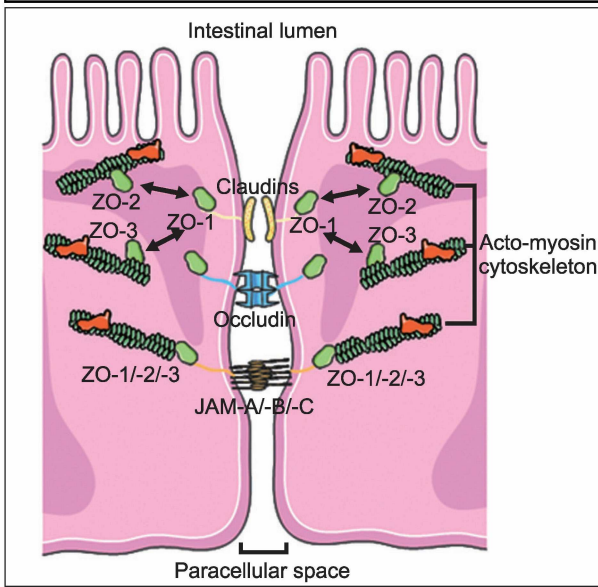

*Internal (inflammatory cytokines)*

### CLIN1001-012, Serum Antibody Levels

— Placebo    — 0.5 mg    - - - 1.0 mg    - - - 2.0 mg

**A. Serum Anti-tTG (IgA)**

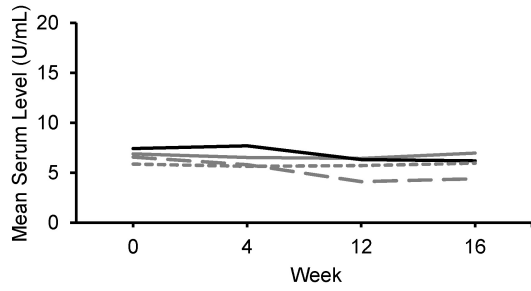

**B. Serum Anti-tTG (IgG)**

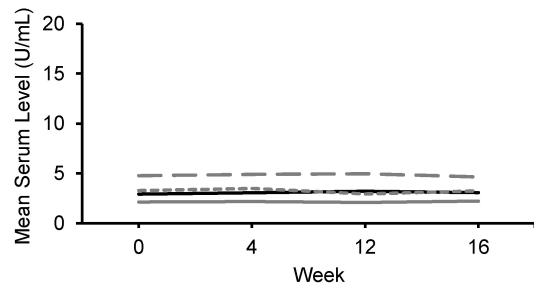

**C. Serum Anti-DGP (IgA)**

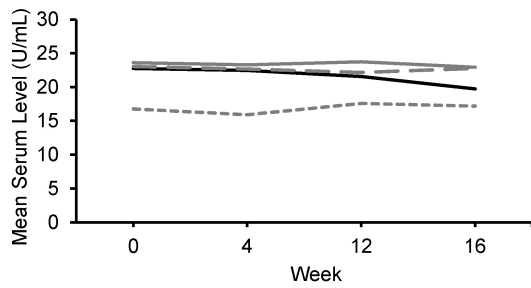

**D. Serum Anti-DGP (IgG)**

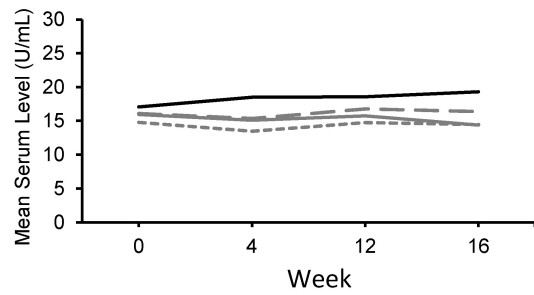

MITT population, n=339
